# Supplementary material for: Can Baseline IL-6 Levels Predict Long COVID in Subjects Hospitalized for SARS-CoV-2 Disease?
Source: MDPI journal article supplement (doi:10.3390/ijms24021731), 2023-01-15
Supplement: s1 [file s1]

**Table S1.** Association between baseline serum IL-6 levels and long COVID symptomatology

| Sign or symptom                              | % of cases in normal serum IL-6 levels | % of cases in high serum IL-6 levels | Model 1 (OR, 95% CI; p-value) | Model 2 (OR, 95% CI; p-value)  | Model 3 (OR, 95% CI; p-value)  |
|----------------------------------------------|----------------------------------------|--------------------------------------|-------------------------------|--------------------------------|--------------------------------|
| <i>Any</i>                                   | 35.4                                   | 64.2                                 | 1.54<br>(1.08-3.03)<br>P=0.02 | 1.56<br>(1.07-3.19)<br>P=0.02  | 2.05<br>(1.04-4.50)<br>p=0.03  |
| <i>Headache</i>                              | 5.2                                    | 4.9                                  | 0.98<br>(0.21-4.69)<br>P=0.98 | 0.88<br>(0.15-5.10)<br>P=0.88  | 0.74<br>(0.10-5.20)<br>P=0.76  |
| <i>Taste disorder (ageusia or dysgeusia)</i> | 5.2                                    | 4.9                                  | 0.66<br>(0.14-3.12)<br>P=0.60 | 0.71<br>(0.13-3.93)<br>P=0.69  | 1.10<br>(0.14-8.59)<br>P=0.93  |
| <i>Smell disorder (anosmia)</i>              | 3.4                                    | 3.3                                  | 1.09<br>(0.19-6.35)<br>P=0.93 | 0.69<br>(0.09-5.32)<br>P=0.72  | 0.50<br>(0.05-5.31)<br>P=0.57  |
| <i>Memory deficits</i>                       | 22.4                                   | 26.2                                 | 1.40<br>(0.62-3.18)<br>P=0.38 | 1.52<br>(0.65-3.57)<br>P=0.34  | 1.67<br>(0.64-4.36)<br>P=0.29  |
| <i>Difficulty concentrating</i>              | 17.2                                   | 24.6                                 | 1.61<br>(0.68-3.82)<br>P=0.28 | 1.60<br>(0.65-3.91)<br>P=0.31  | 1.75<br>(0.66-4.66)<br>P=0.26  |
| <i>Dizziness</i>                             | 6.9                                    | 4.9                                  | 0.76<br>(0.19-2.94)<br>P=0.69 | 0.68<br>(0.16-2.98)<br>P=0.61  | 2.29<br>(0.33-16.02)<br>P=0.41 |
| <i>Tremors</i>                               | 5.2                                    | 3.3                                  | 0.49<br>(0.10-2.57)<br>P=0.40 | 0.48<br>(0.09-2.58)<br>P=0.39  | 0.27<br>(0.04-2.02)<br>P=0.20  |
| <i>Cramps</i>                                | 6.9                                    | 3.3                                  | 0.36<br>(0.08-1.72)<br>P=0.20 | 0.25<br>(0.04-1.39)<br>P=0.11  | 0.17<br>(0.02-1.31)<br>P=0.09  |
| <i>Visual impairment</i>                     | 6.9                                    | 4.1                                  | 1.31<br>(0.24-7.14)<br>P=0.76 | 1.32<br>(0.23-7.58)<br>P=0.76  | 3.66<br>(0.41-32.57)<br>P=0.25 |
| <i>Cough</i>                                 | 6.9                                    | 7.4                                  | 1.25<br>(0.30-2.26)<br>P=0.76 | 1.67<br>(0.37-7.47)<br>P=0.50  | 2.25<br>(0.38-13.31)<br>P=0.37 |
| <i>Dyspnea</i>                               | 24.1                                   | 20.5                                 | 0.77<br>(0.34-1.74)<br>P=0.53 | 0.86<br>(0.36-2.07)<br>P=0.74  | 1.16<br>(0.44-3.04)<br>P=0.76  |
| <i>Oxygen use</i>                            | 1.7                                    | 4.1                                  | 2.04<br>(0.22-18.9)<br>P=0.53 | 1.74<br>(0.13-21.49)<br>P=0.68 | 1.38<br>(0.09-21.9)<br>P=0.82  |
| <i>Nasal congestion</i>                      | 3.4                                    | 1.6                                  | 0.49<br>(0.07-3.63)<br>P=0.49 | 0.35<br>(0.04-3.07)<br>P=0.34  | 0.46<br>(0.04-5.89)<br>P=0.55  |
| <i>Voice change</i>                          | 3.4                                    | 2.5                                  | 0.81<br>(0.12-5.21)<br>P=0.82 | 1.74<br>(0.15-20.44)<br>P=0.66 | 2.65<br>(0.12-50.91)<br>P=0.56 |
| <i>Mobility decline</i>                      | 6.9                                    | 13.1                                 | 2.02                          | 2.40                           | 2.55                           |

| Sign or symptom                | % of cases in normal serum IL-6 levels | % of cases in high serum IL-6 levels | Model 1 (OR, 95% CI; p-value)  | Model 2 (OR, 95% CI; p-value)  | Model 3 (OR, 95% CI; p-value)   |
|--------------------------------|----------------------------------------|--------------------------------------|--------------------------------|--------------------------------|---------------------------------|
|                                |                                        |                                      | (1.63-651)<br>P=0.02           | (1.71-8.11)<br>P=0.02          | (1.08-9.40)<br>p=0.02           |
| <b>Palpitations</b>            | 10.3                                   | 5.7                                  | 0.62<br>(0.16-2.46)<br>P=0.49  | 0.62<br>(0.15-2.62)<br>P=0.52  | 0.79<br>(0.14-4.54)<br>P=0.80   |
| <b>Chest pain</b>              | 8.6                                    | 4.1                                  | 0.39<br>(0.10-1.56)<br>P=0.18  | 0.31<br>(0.06-1.53)<br>P=0.15  | 0.88<br>(0.10-8.16)<br>P=0.91   |
| <b>Flushing</b>                | 0.0                                    | 2.5                                  | Not possible                   | Not possible                   | Not possible                    |
| <b>Abdominal pain</b>          | 5.2                                    | 0.8                                  | 0.23<br>(0.02-2.68)<br>P=0.24  | 0.25<br>(0.02-2.97)<br>P=0.27  | 0.23<br>(0.01-3.77)<br>P=0.30   |
| <b>Diarrhea</b>                | 1.7                                    | 2.5                                  | 1.68<br>(0.16-17.23)<br>P=0.66 | 2.36<br>(0.20-29.98)<br>P=0.50 | 2.39<br>(0.16-35.87)<br>P=0.53  |
| <b>Vomit</b>                   | 1.7                                    | 0.0                                  | Not possible                   | Not possible                   | Not possible                    |
| <b>Loss of appetite</b>        | 6.9                                    | 1.6                                  | 0.48<br>(0.07-3.53)<br>P=0.47  | 0.05<br>(0.001-2.63)<br>P=0.14 | 0.23<br>(0.001-107.4)<br>P=0.64 |
| <b>Rash</b>                    | 3.4                                    | 2.5                                  | 1.38<br>(0.14-13.68)<br>P=0.79 | 1.53<br>(0.14-16.54)<br>P=0.73 | 1.09<br>(0.08-15.80)<br>P=0.95  |
| <b>Hair loss</b>               | 6.9                                    | 4.9                                  | 1.03<br>(0.21-5.17)<br>P=0.97  | 1.00<br>(0.19-5.39)<br>P=0.99  | 0.30<br>(0.03-2.74)<br>P=0.29   |
| <b>Involuntary weight loss</b> | 3.4                                    | 1.6                                  | 0.48<br>(0.07-3.53)<br>P=0.47  | 0.40<br>(0.05-3.29)<br>P=0.40  | 0.24<br>(0.02-3.03)<br>P=0.27   |
| <b>Myalgia</b>                 | 20.7                                   | 17.2                                 | 1.05<br>(0.43-2.56)<br>P=0.91  | 1.03<br>(0.41-2.59)<br>P=0.95  | 1.30<br>(0.46-3.68)<br>P=0.62   |
| <b>Pain</b>                    | 22.8                                   | 19.7                                 | 0.92<br>(0.41-2.09)<br>P=0.84  | 0.96<br>(0.41-2.24)<br>P=0.93  | 1.20<br>(0.47-3.08)<br>P=0.70   |
| <b>Flulike symptoms</b>        | 3.4                                    | 3.3                                  | 1.10<br>(0.18-6.56)<br>P=0.92  | 1.12<br>(0.17-7.19)<br>P=0.91  | 1.47<br>(0.18-11.91)<br>P=0.72  |
| <b>Fever</b>                   | 0.0                                    | 1.7                                  | Not possible                   | Not possible                   | Not possible                    |
| <b>Fatigue</b>                 | 43.1                                   | 40.2                                 | 1.08<br>(0.54-2.14)<br>P=0.83  | 1.12<br>(0.54-2.31)<br>P=0.76  | 1.55<br>(0.70-3.46)<br>P=0.28   |
| <b>Arthralgia</b>              | 20.7                                   | 17.2                                 | 1.12<br>(0.46-2.69)<br>P=0.80  | 1.32<br>(0.53-3.27)<br>P=0.56  | 1.83<br>(0.66-5.07)<br>P=0.25   |
| <b>Sore throat</b>             | 5.2                                    | 2.5                                  | 0.49<br>(0.09-2.60)<br>P=0.40  | 0.40<br>(0.07-2.39)<br>P=0.31  | 0.22<br>(0.02-2.14)<br>P=0.19   |
| <b>Sweats</b>                  | 6.9                                    | 1.6                                  | 0.34                           | 0.30                           | 0.24                            |

| Sign or symptom               | % of cases in normal serum IL-6 levels | % of cases in high serum IL-6 levels | Model 1<br>(OR,<br>95% CI;<br>p-value) | Model 2<br>(OR,<br>95% CI;<br>p-value) | Model 3<br>(OR,<br>95% CI;<br>p-value) |
|-------------------------------|----------------------------------------|--------------------------------------|----------------------------------------|----------------------------------------|----------------------------------------|
|                               |                                        |                                      | (0.05-2.23)<br>P=0.26                  | (0.04-2.40)<br>P=0.25                  | (0.02-3.14)<br>P=0.27                  |
| <b><i>Conjunctivitis</i></b>  | 5.2                                    | 0.8                                  | 0.16<br>(0.02-1.55)<br>P=0.11          | 0.13<br>(0.01-1.49)<br>P=0.10          | 0.07<br>(0.002-2.84)<br>P=0.16         |
| <b><i>PTSD</i></b>            | 5.5                                    | 12.3                                 | 1.86<br>(0.57-6.11)<br>P=0.31          | 2.00<br>(1.05-6.69)<br>P=0.03          | 2.38<br>(1.06-8.61)<br>p=0.02          |
| <b><i>Depression</i></b>      | 11.3                                   | 10.8                                 | 0.76<br>(0.26-2.22)<br>P=0.62          | 0.78<br>(0.26-2.33)<br>P=0.65          | 1.52<br>(0.40-5.72)<br>P=0.54          |
| <b><i>Sleep disorders</i></b> | 17.2                                   | 11.5                                 | 0.93<br>(0.34-2.55)<br>P=0.88          | 0.81<br>(0.28-2.39)<br>P=0.71          | 1.25<br>(0.35-4.42)<br>P=0.73          |
| <b><i>Anxiety</i></b>         | 10.7                                   | 15.4                                 | 2.00<br>(0.62-6.38)<br>P=0.24          | 2.05<br>(0.63-6.66)<br>P=0.24          | 2.66<br>(0.77-9.20)<br>P=0.12          |

All the data are reported as odds ratio with 95% confidence interval and correspondent p-values, calculated for elevated serum IL-6 vs. normal values. Model 1 was adjusted for age and sex; model 2 was adjusted for covariates in model 1 and comorbidities (yes vs. no), smoking status (actual, previous, never), PaO<sub>2</sub>/FiO<sub>2</sub> ratio, haemoglobin levels, renal function (all measured within the first four days of hospitalization), presence of pneumonia during hospitalization; model 3 was adjusted for the covariates included in model 1 and model 2 and other serum parameters of inflammation (white cells, C reactive protein, changes during hospitalization of IL-6).

**Figure S1. Distribution of serum IL-6 levels in the patients included**

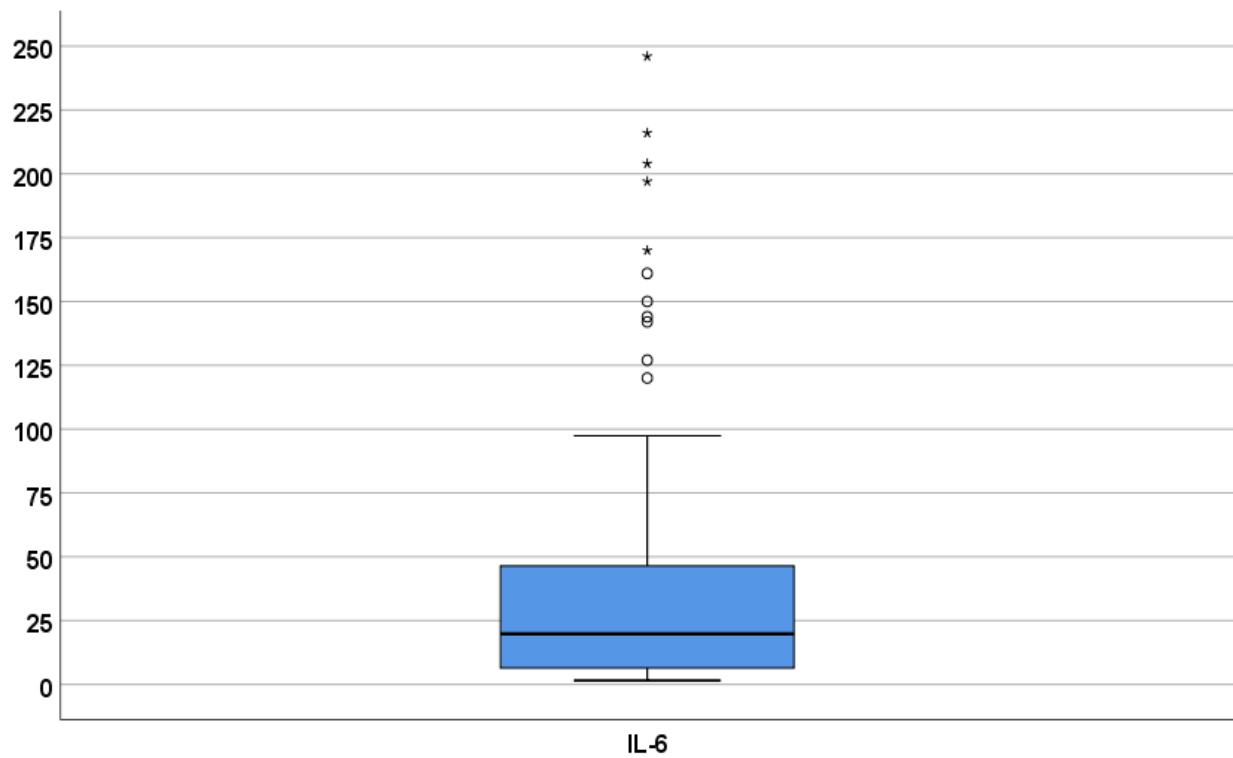

The circle is an indication of outlier; the asterisk is an indication that an extreme outlier.
